# Supplementary material for: Tumor BRCA Testing in Epithelial Ovarian Cancers: Past and Future—Five-Years’ Single-Institution Experience of 762 Consecutive Patients
Source: MDPI journal article supplement (doi:10.3390/cancers14071638), 2022-03-23
Supplement: s1 [file s1]

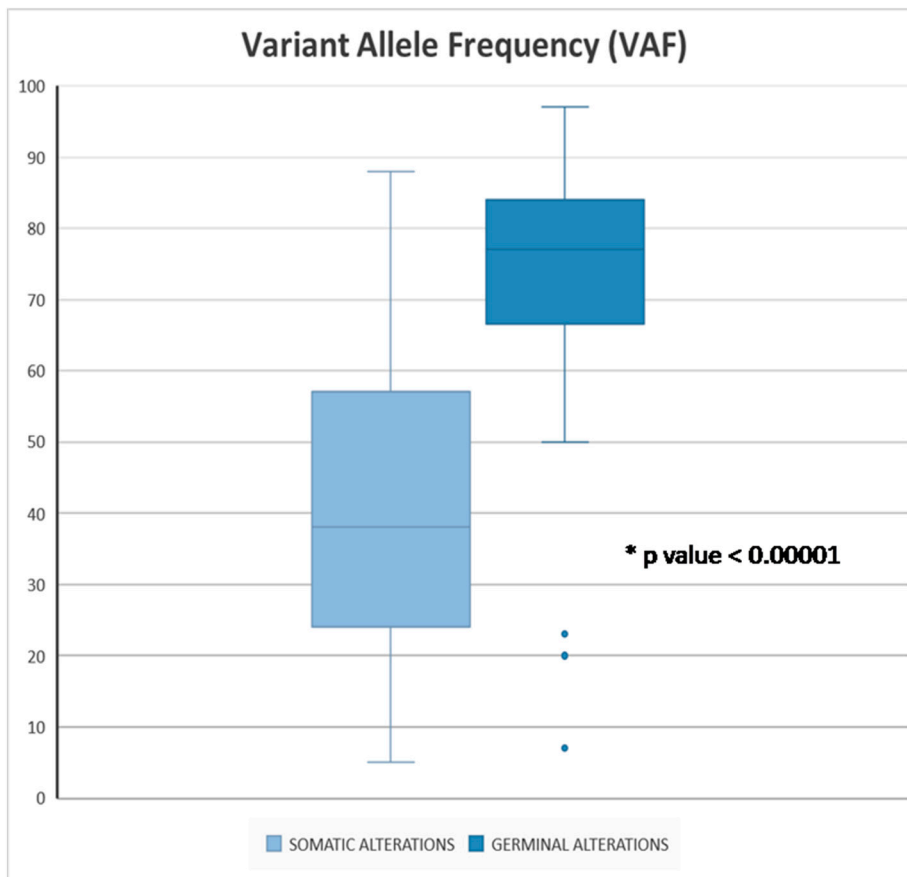

**Figure S1** Supplementary: Variant Allele Frequencies (VAF) of somatic and germinal alterations. A statistically significant difference among VAF distribution was reported according to the somatic or germline nature of the alteration.
